# Supplementary material
Source: Research Square preprint supplement (doi:10.21203/rs.3.rs-9262033/v1)
Supplement: Supplementary file 1 [file 8abe5d7ba3e20a0aa6ede606.docx]

**Highlights**

- Motor competence measured by the Test of Gross Motor Development–Second Edition total score was strongly correlated with overall adaptive behavior level (Pearson correlation coefficient = 0.813, p value < 0.001).
- The Test of Gross Motor Development–Second Edition total score explained substantial variance in overall adaptive behavior level (coefficient of determination = 0.74; F statistic = 211; p value < 0.001).
- The Test of Gross Motor Development–Second Edition total score showed stronger correlations with independence and socialization than with cognition (Pearson correlation coefficient = 0.536 and 0.655 versus 0.292; all p values < 0.001).
- Receiver operating characteristic analysis indicated that the Test of Gross Motor Development–Second Edition total score excellently discriminated low adaptive behavior level (adaptive behavior level < 70), with an area under the curve of 0.947.
- A Test of Gross Motor Development–Second Edition total score cut-off of 34.5 achieved sensitivity of 93.1% and specificity of 87.9% for identifying low adaptive behavior level (adaptive behavior level < 70), supporting its clinical use as a screening threshold to flag children who may warrant further functional evaluation and targeted support in residential care.
